# Supplementary material for: Molecular networking prospection and characterization of terpenoids and C15-acetogenins in Brazilian seaweed extracts
Source: Royal Society of Chemistry journal article supplement (doi:10.1039/c8ra02802h), 2018-01-01
Supplement: c8ra02802h1.pdf [file c8ra02802h1.pdf]

## Supporting Information

### **Molecular Networking prospection and characterization of terpenoids and C<sub>15</sub>-acetogenins from the Brazilian seaweeds**

Ana Cláudia Philippus, †<sup>a</sup> Gabriele A. Zatelli, †<sup>a</sup> Tauana Wanke, <sup>a</sup> Maria Gabriela A. de Barros,<sup>a</sup> Satomy A. Kami,<sup>a</sup> Cintia Lhullier,<sup>a</sup> Lorene Armstrong,<sup>a</sup> Louis P. Sandjo<sup>a</sup> and Miriam Falkenberg \*<sup>a</sup>

<sup>a</sup> Federal University of Santa Catarina (UFSC), Postgraduate Program in Pharmacy, Health Sciences Center, Florianópolis, 88.040-900, Brazil. E-mail: miriam.falkenberg@gmail.com

### Supporting Information List

Page S2-4.  $^1\text{H}$ ,  $^{13}\text{C}$ , HSQC and HMBC NMR spectra of compound **9** (pachydietyol A).

Page S5-6.  $^1\text{H}$ ,  $^{13}\text{C}$  NMR spectra, and IR experiment of compound **20** (prepacifenol epoxide).

Page S7-9.  $^1\text{H}$ ,  $^{13}\text{C}$ , HSQC, HMBC and COSY NMR spectra, and IR experiment of compound **21** (johnstonol).

Page S10-12.  $^1\text{H}$ ,  $^{13}\text{C}$ , HMBC and COSY NMR spectra, and IR experiment of compound **27** (pacifenol).

Page S13. Box S1. Compounds related to nodes.

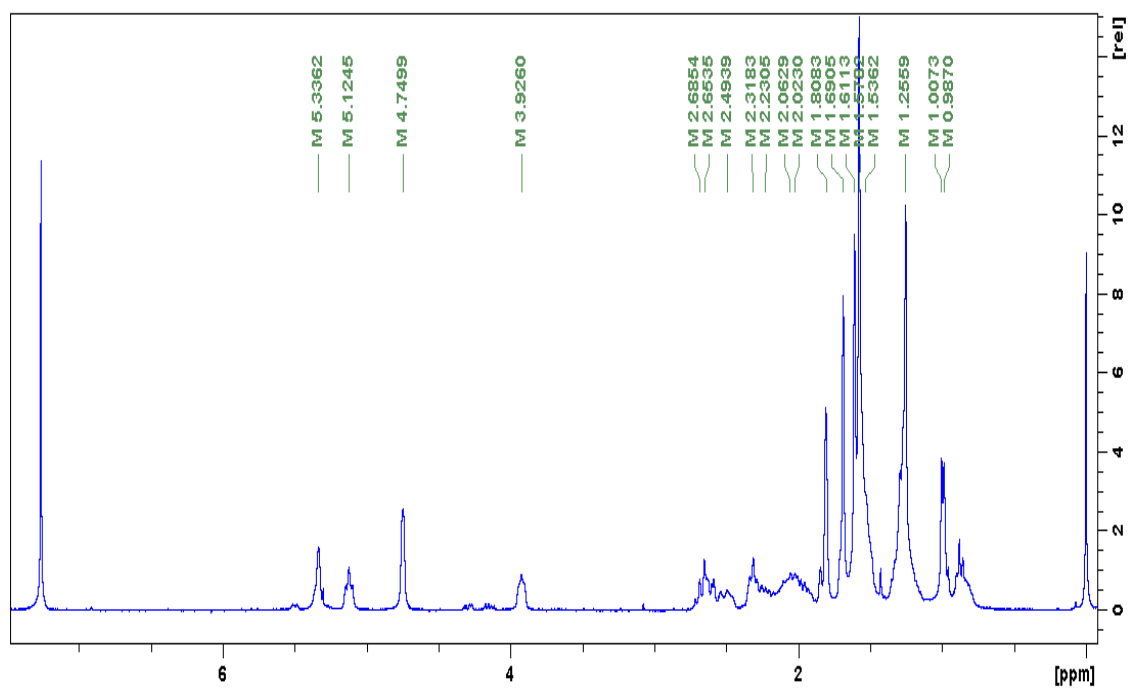

Figure S1.  $^1\text{H}$  (400 Hz) NMR Spectrum of pachydietylol A (**9**) in  $\text{CDCl}_3$ .

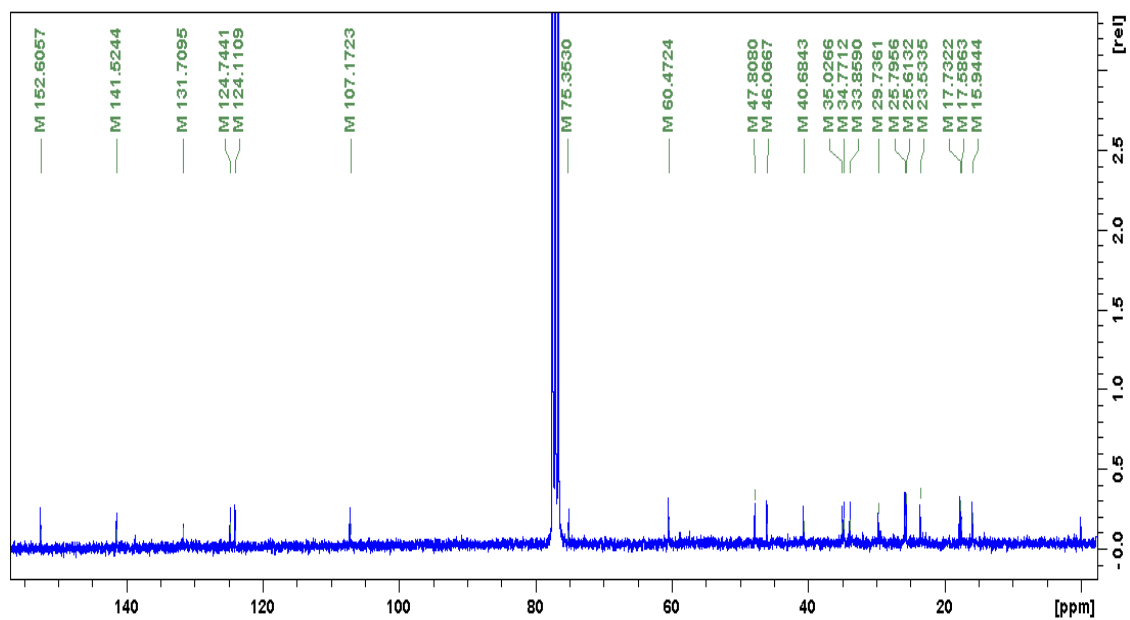

Figure S2.  $^{13}\text{C}$  (400 Hz) NMR Spectrum of pachydietylol A (**9**) in  $\text{CDCl}_3$ .

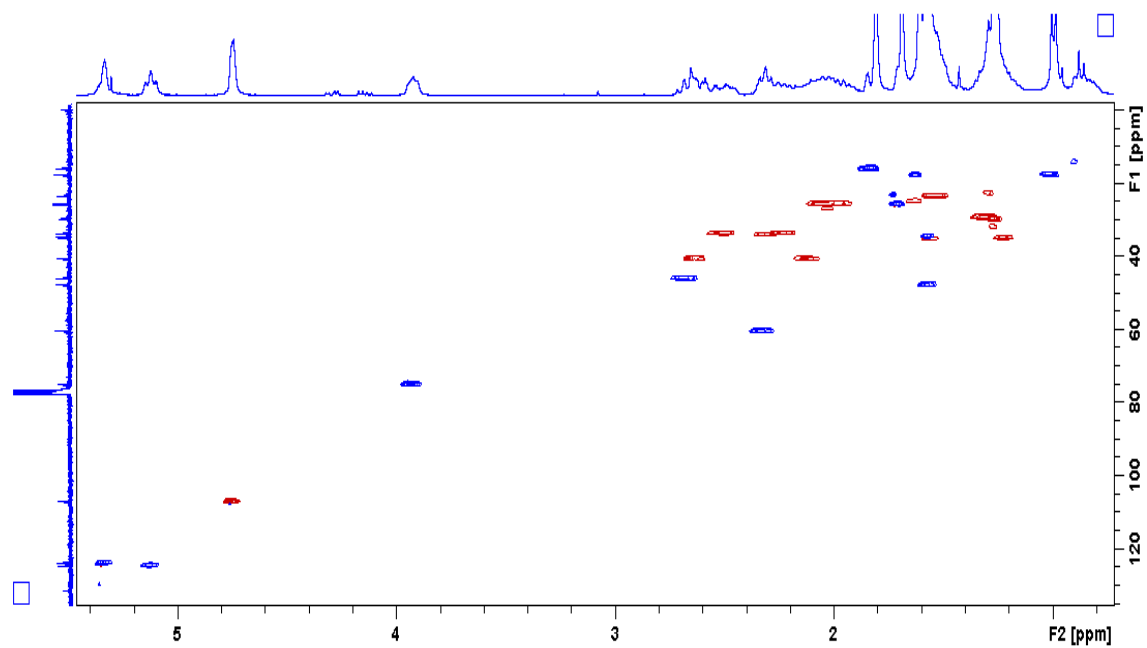

Figure S3. HSQC (400/100 Hz) NMR Spectrum of pachydictyol A (**9**) in CDCl<sub>3</sub>.

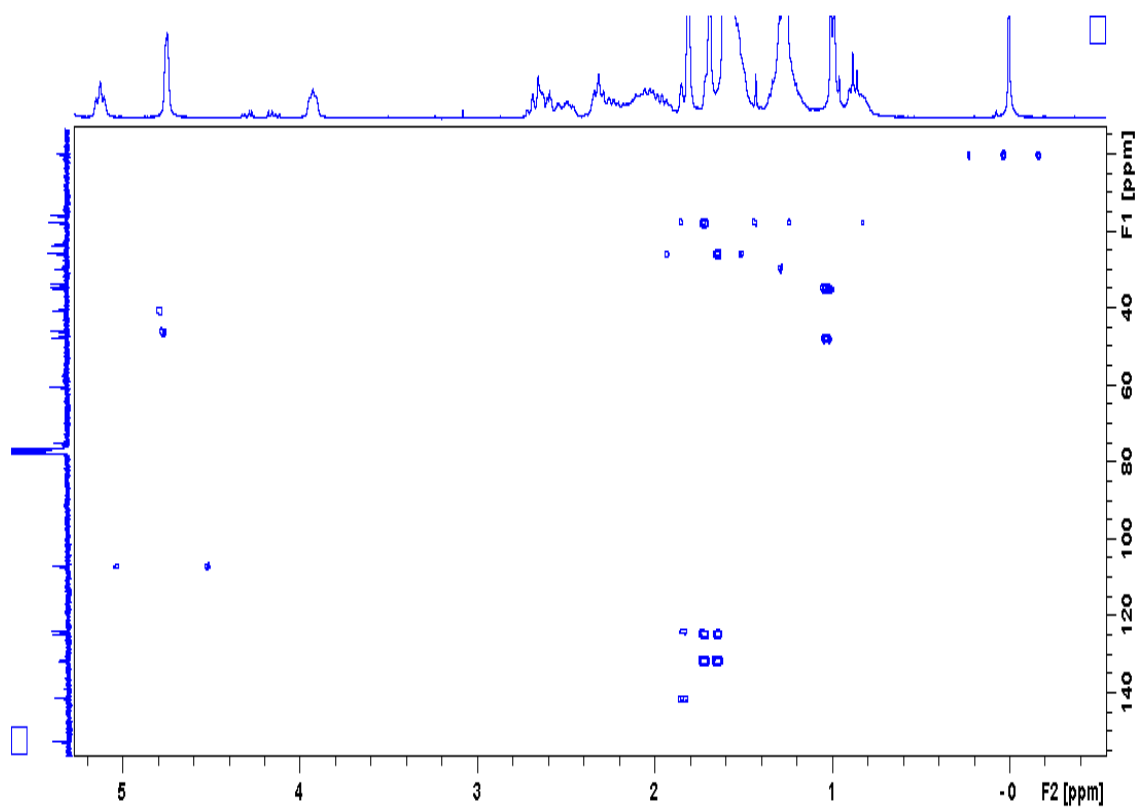

Figure S4. HMBC (400/100 Hz) NMR Spectrum of pachydictyol A (**9**) in CDCl<sub>3</sub>.

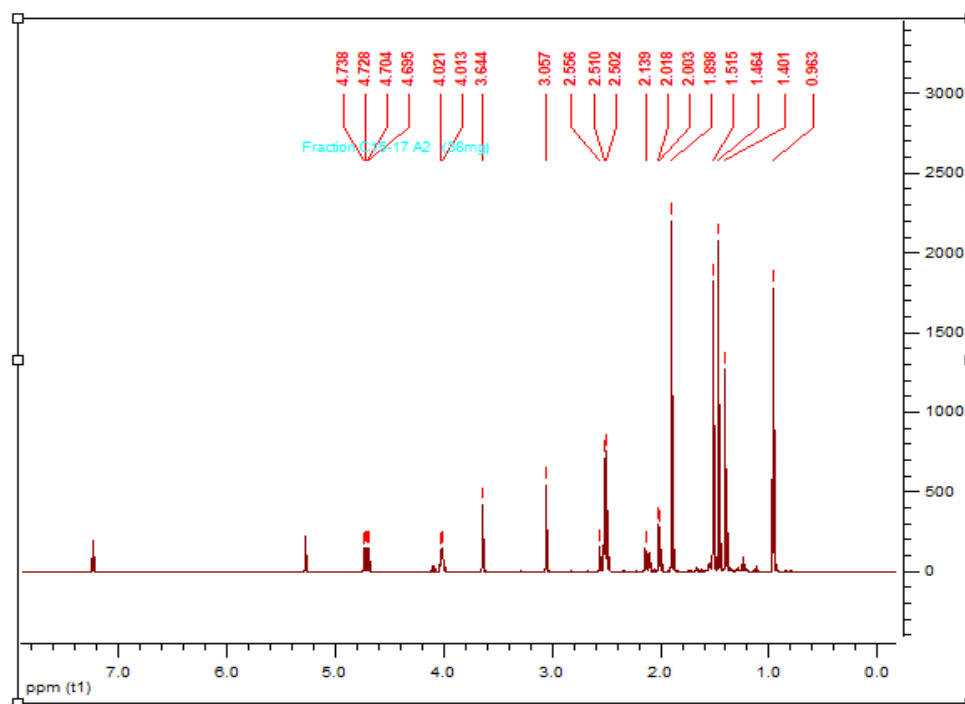

Figure S5.  $^1\text{H}$  (400 Hz) NMR Spectrum of prepacifenol epoxide (**20**) in  $\text{CDCl}_3$ .

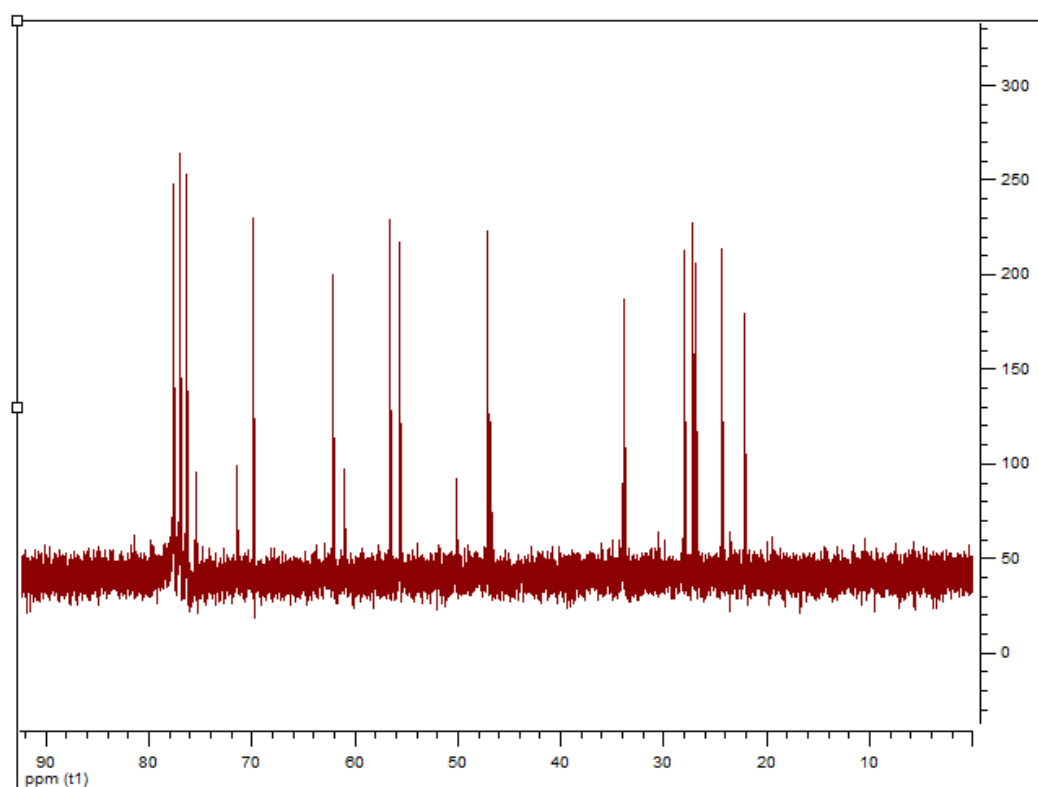

Figure S6.  $^{13}\text{C}$  (400 Hz) NMR Spectrum of prepacifenol epoxide (**20**) in  $\text{CDCl}_3$ .

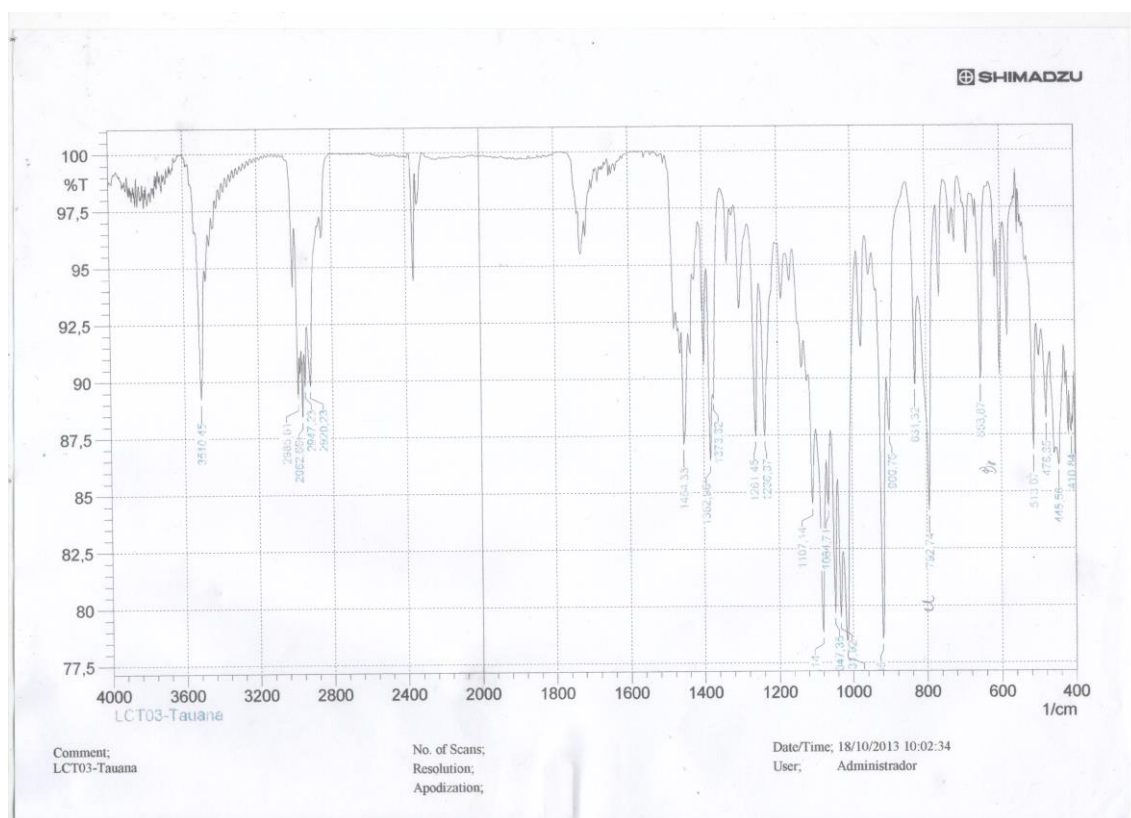

Figure S7. IR spectrum of prepacifenol epoxide (20)

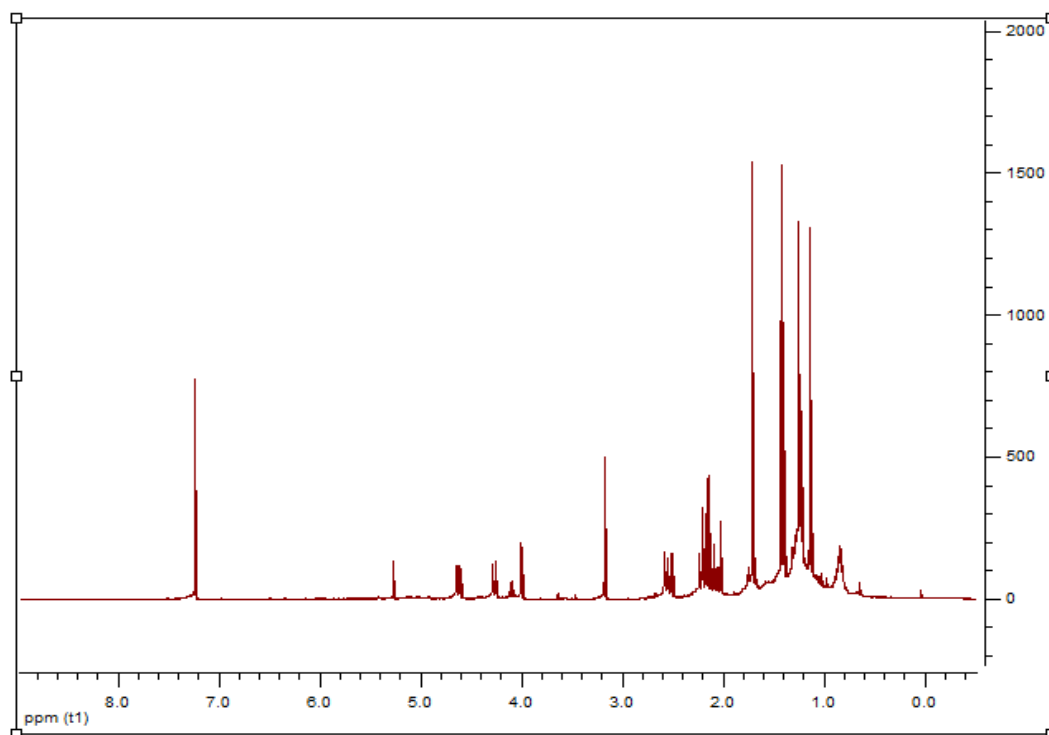

Figure S8.  $^1\text{H}$  (400 Hz) NMR Spectrum of johnstonol (**21**) in  $\text{CDCl}_3$ .

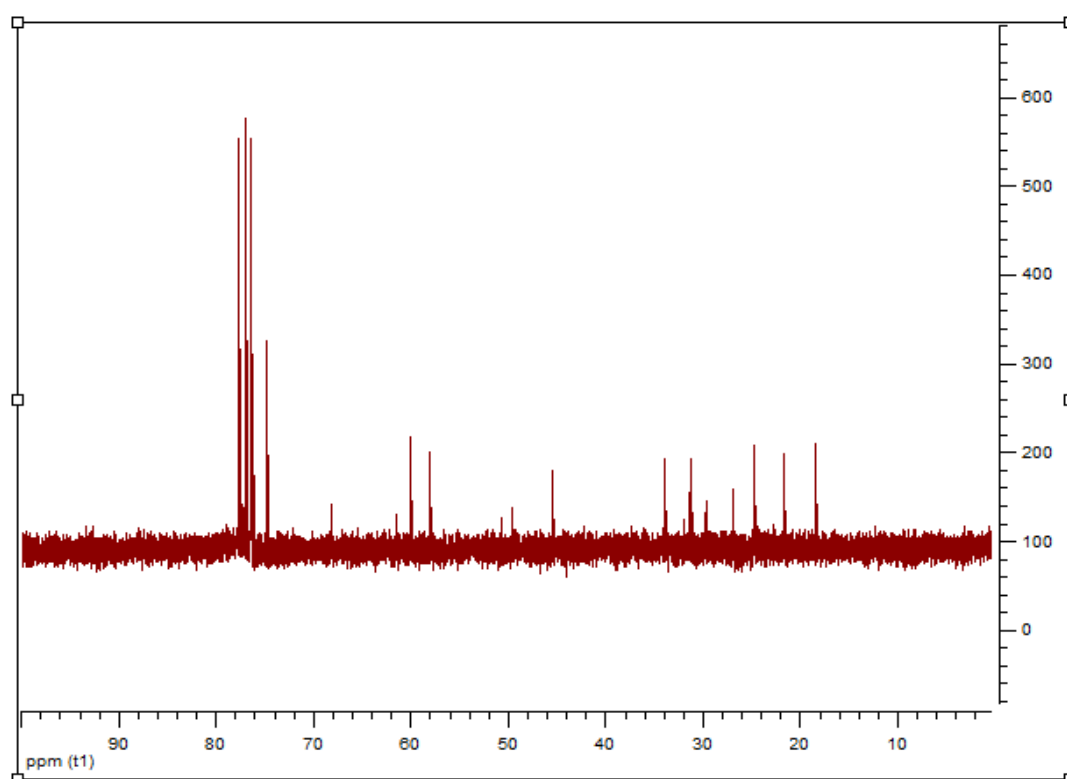

Figure S9.  $^{13}\text{C}$  (400 Hz) NMR Spectrum of johnstonol (**21**) in  $\text{CDCl}_3$

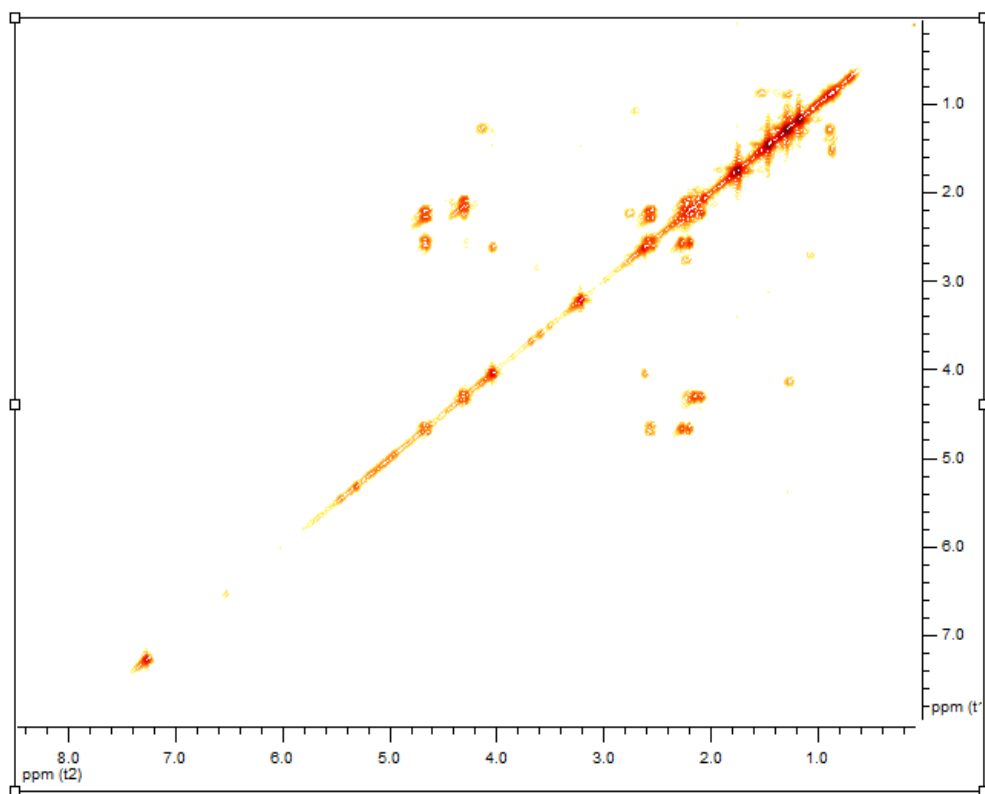

Figure S10.  $^1\text{H}$ - $^1\text{H}$  COSY (400 Hz) NMR Spectrum of johnstonol (**21**) in  $\text{CDCl}_3$ .

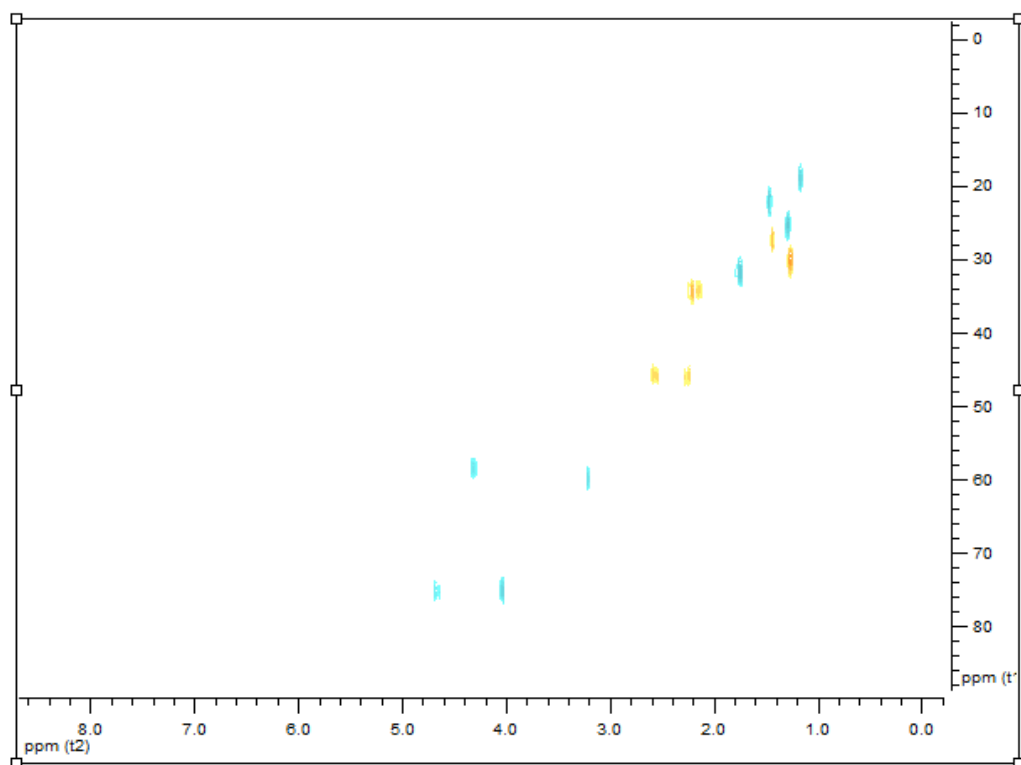

Figure S11. HSQC (400/100 Hz) NMR Spectrum of johnstonol (**21**) in  $\text{CDCl}_3$ .



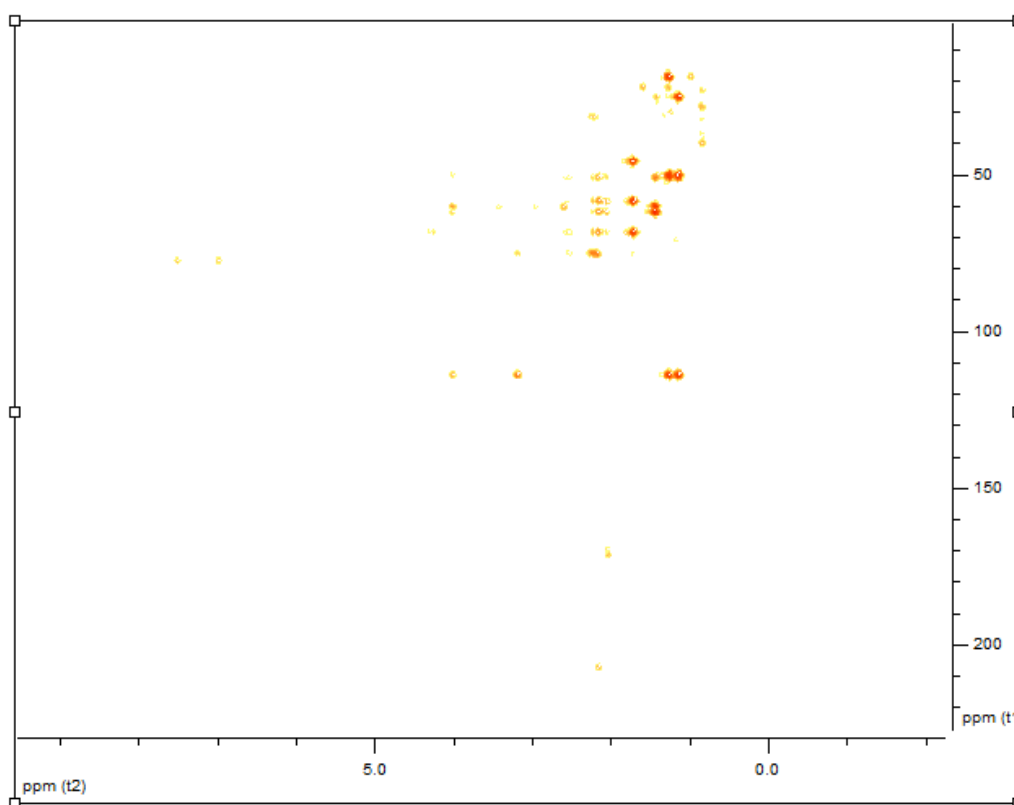

Figure S12. HMBC (400/100 Hz) NMR Spectrum of johnstonol (**21**) in  $\text{CDCl}_3$ .

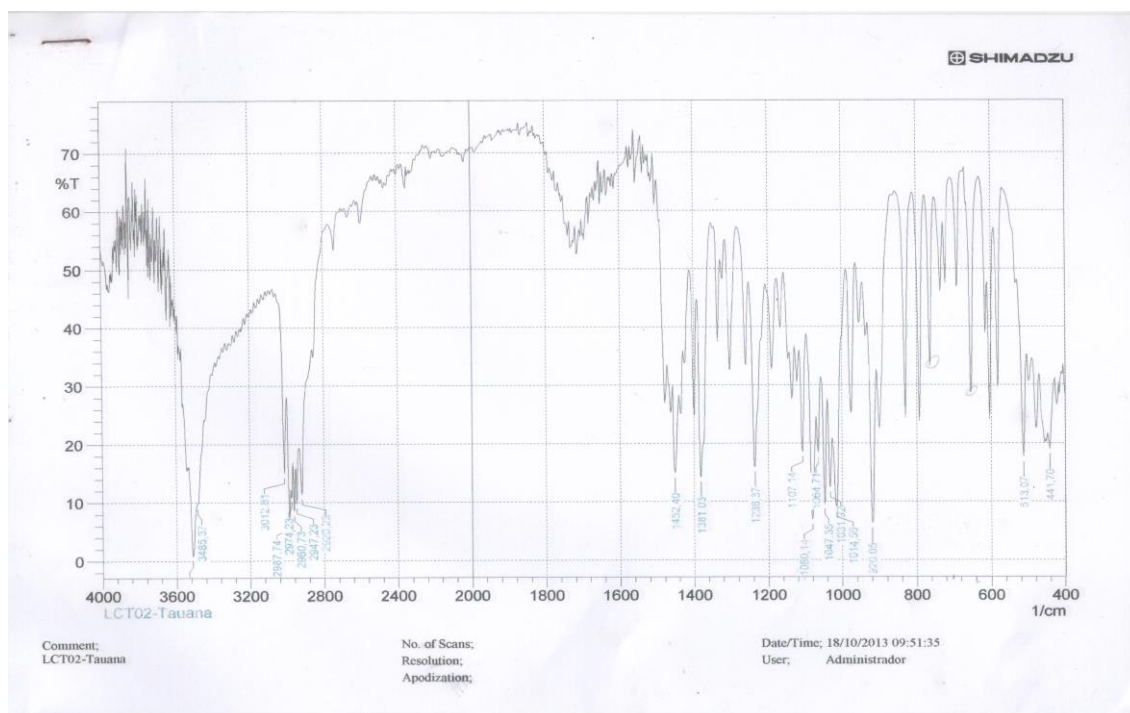

Figure S13. IR spectrum of johnstonol (**21**)

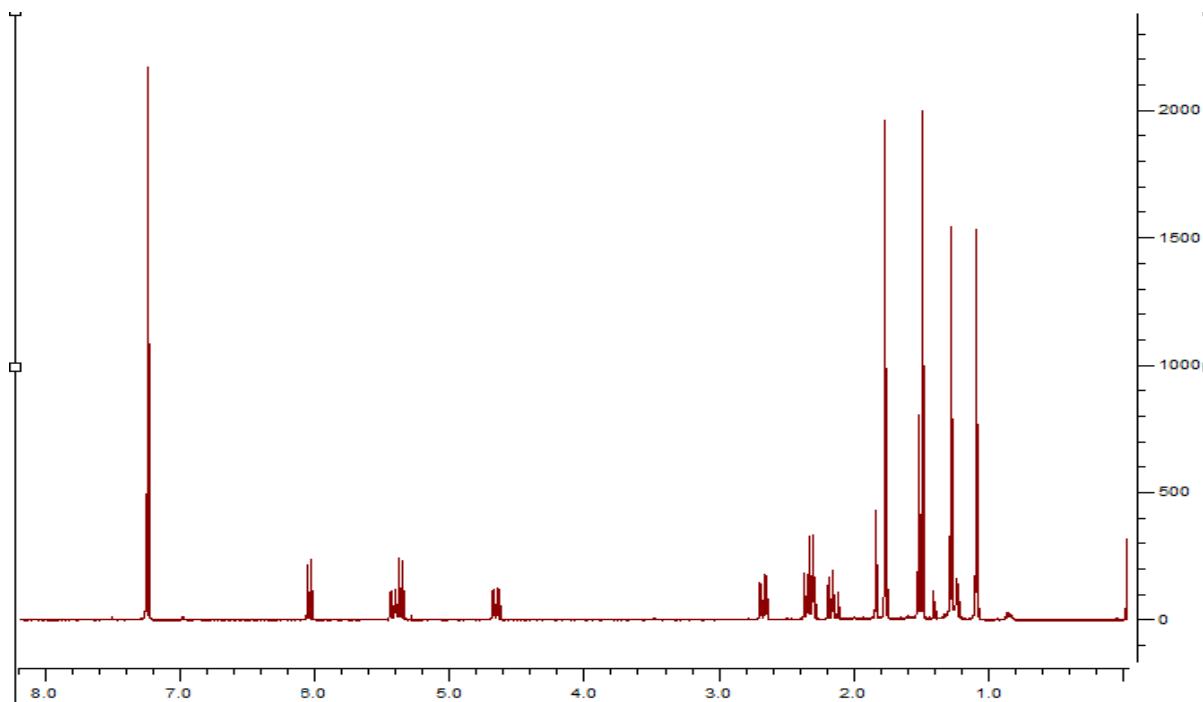

Figure S14.  $^1\text{H}$  (400 Hz) NMR Spectrum of pacifenol (**27**) in  $\text{CDCl}_3$ .

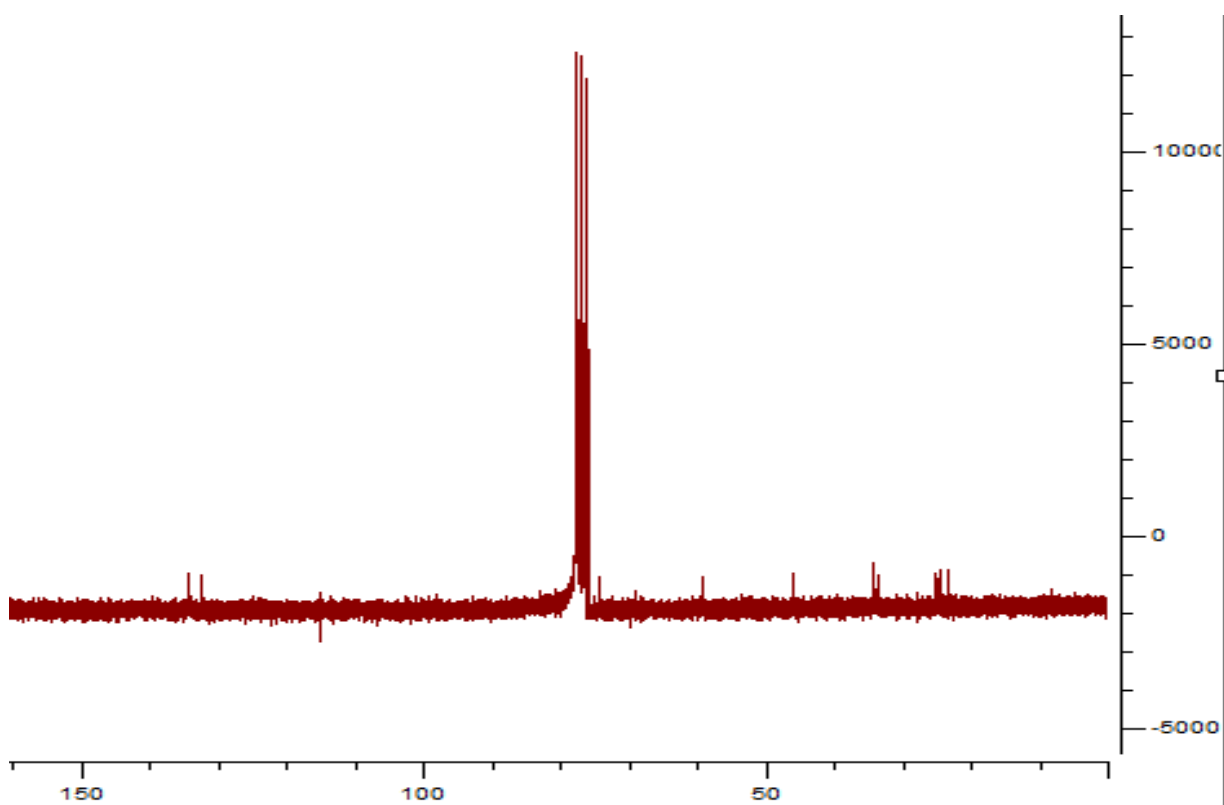

Figure S15.  $^{13}\text{C}$  (400 Hz) NMR Spectrum of pacifenol (**27**) in  $\text{CDCl}_3$ .

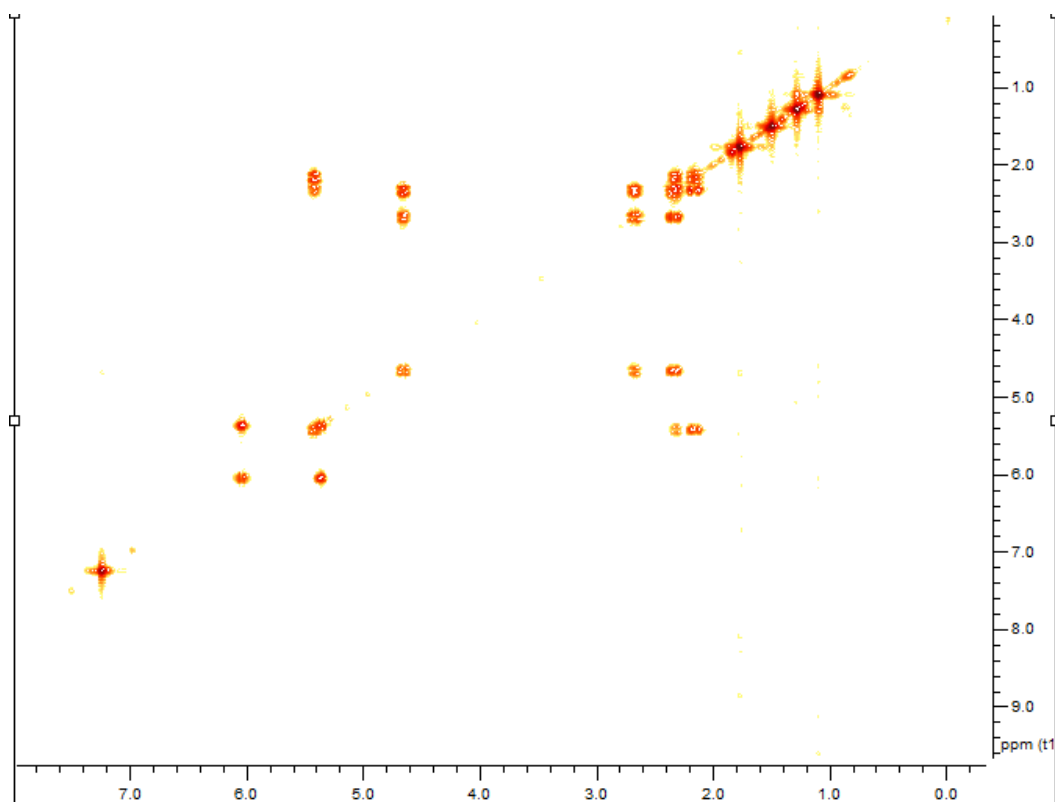

Figure S16.  $^1\text{H}$ - $^1\text{H}$  COSY (400 Hz) NMR Spectrum of pacifenol (**27**) in  $\text{CDCl}_3$ .

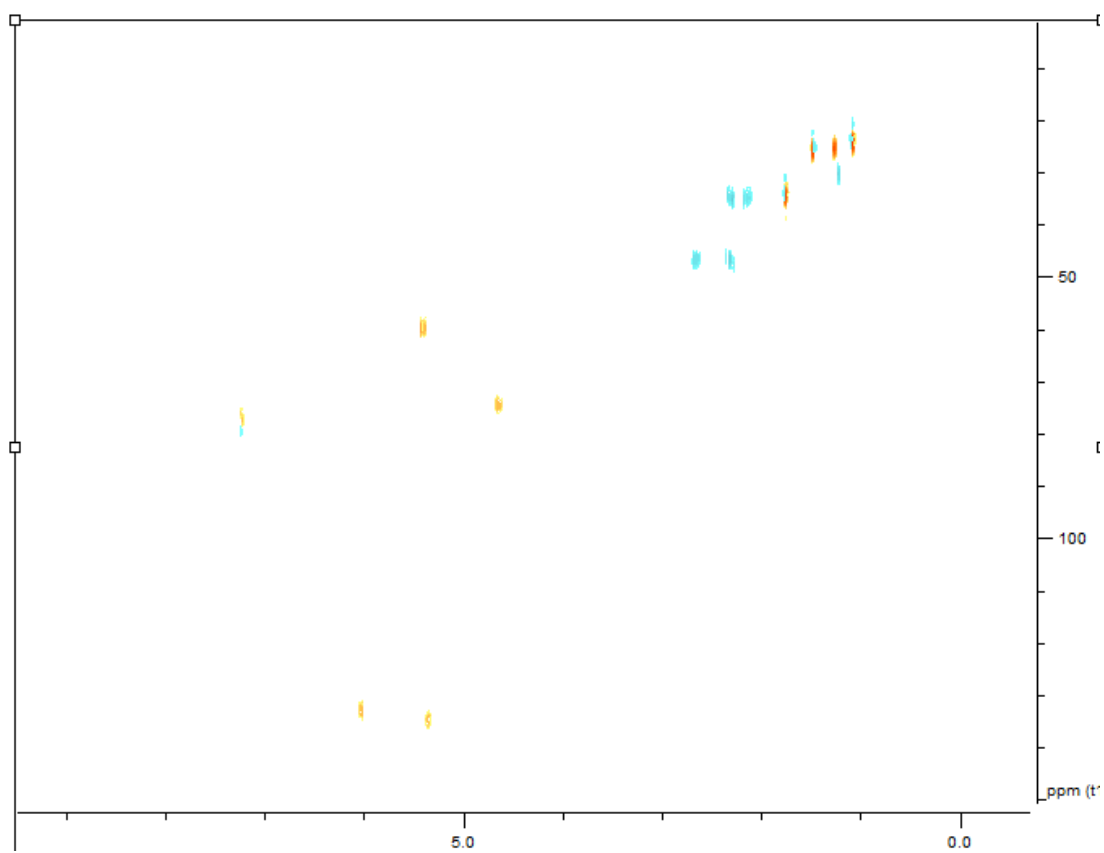

Figure S17. HSQC (400/100 Hz) NMR Spectrum of pacifenol (**27**) in  $\text{CDCl}_3$ .

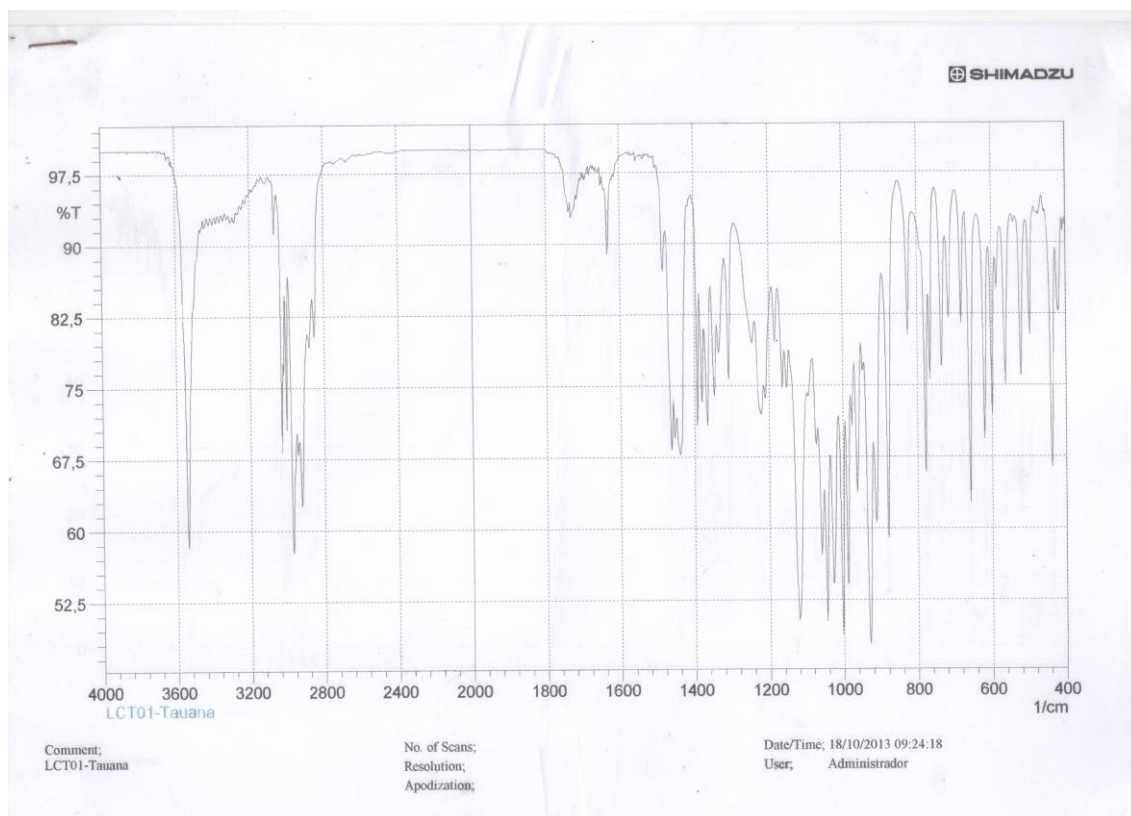

Figure S18. IR spectrum of pacifenol (27)

Box S1. Compounds related to nodes.

| Family    | Node                                                               | Extract Code          | Compound                                                              | Class                                  | Reference |
|-----------|--------------------------------------------------------------------|-----------------------|-----------------------------------------------------------------------|----------------------------------------|-----------|
| <b>F1</b> | <i>m/z</i> 319.2274                                                | CC1, CC2,<br>DM1, DM3 | 4 $\beta$ -hydroxydictyodial ( <b>1</b> )                             | Xeniane<br>diterpene                   | 14        |
|           | <i>m/z</i> 361.2383<br><i>m/z</i> 301.2167                         | CC1, DM1              | 4 $\beta$ -acetoxydictyodial A ( <b>2</b> )                           | Xeniane<br>diterpene                   | 13        |
|           | <i>m/z</i> 321.2441<br><i>m/z</i> 303.2332                         | CC1, CC3,<br>DM2, DM3 | 18,4-dihydroxydictyo-19-al A ( <b>3</b> )                             | Xeniane<br>diterpene                   | 14        |
|           | <i>m/z</i> 267.2134                                                | CC3, DM1              | 18-acetoxy-4-hydroxydictyo-19-al<br>A ( <b>4</b> )                    | Xeniane<br>diterpene                   | 14        |
|           | <i>m/z</i> 269.2265<br><i>m/z</i> 270.2309                         | CC1, CC2,<br>DM2      | dictyotadiol ( <b>5</b> )                                             | Prenylated<br>guaiane<br><br>diterpene | 15        |
|           |                                                                    |                       | dictyol B ( <b>6</b> )                                                | Prenylated<br>guaiane diterpene        | 13        |
|           | <i>m/z</i> 369.2395                                                | CC2, DM2              | dictyol B acetate ( <b>7</b> )                                        |                                        |           |
|           | <i>m/z</i> 271.2439<br><i>m/z</i> 272.2452                         | CC1, CC2,<br>DM2      | dictyoxide ( <b>8</b> )                                               | Prenylated<br>guaiane diterpene        | 12        |
|           |                                                                    |                       | pachydictyol A ( <b>9</b> )                                           | Prenylated<br>guaiane diterpene        | 12        |
|           | <b>F2</b>                                                          | -                     | CC2, CC3,<br>DM2, DP1,<br>DP3                                         | -                                      | -         |
| <b>F3</b> | <i>m/z</i> 412.9883,<br><i>m/z</i> 414.9859<br><i>m/z</i> 416.9840 | LC2                   | 9-hydroxy-4,10-dibromo-3-<br>chlorochamigrene ( <b>10</b> )           | Chamigrane<br>sesquiterpene            | 21,22,23  |
|           |                                                                    |                       | 2,10-dibromo-3-chloro-8-<br>hydroxychamigrene ( <b>11</b> )           | Chamigrane<br>sesquiterpene            | 24        |
|           |                                                                    |                       | laucapyranoid A ( <b>12</b> )                                         | Bisabolane<br>sesquiterpene            | 25        |
| <b>F4</b> | <i>m/z</i> 412.9717,<br><i>m/z</i> 414.9692<br><i>m/z</i> 432.9804 | LC2                   | laucapyranoid B ( <b>13</b> )                                         | Bisabolane<br>sesquiterpene            | 25        |
|           |                                                                    |                       | laucapyranoid C ( <b>14</b> )                                         | Bisabolane<br>sesquiterpene            | 25        |
|           |                                                                    |                       | 4,10-dibromo-3-chloro-7,8-<br>epoxy-9-hydroxychamigrene ( <b>15</b> ) | Chamigrane<br>sesquiterpene            | 25        |

|                        |                              |                    |                                                                   |                             |          |
|------------------------|------------------------------|--------------------|-------------------------------------------------------------------|-----------------------------|----------|
|                        |                              |                    | 4,10-dibromo-3-chloro-7,8-epoxychamigrane ( <b>16</b> )           | Chamigrane sesquiterpene    | 26       |
|                        |                              |                    | 4,10-dibromo-3-chloro-7,8-epoxy-5-hydroxychamigrane ( <b>17</b> ) | Chamigrane sesquiterpene    | 27       |
| <b>F5</b>              | -                            | DM1, DM2, CC1, DP1 | -                                                                 | -                           | -        |
| <b>F6</b>              | -                            | DM1, DM3           | -                                                                 | -                           | -        |
| <b>F7</b>              | m/z 390.9736                 | LC1                | lauredecumallene A ( <b>18</b> )                                  | C <sub>15</sub> -acetogenin | 29       |
|                        |                              |                    | lauredecumallene B ( <b>19</b> )                                  | C <sub>15</sub> -acetogenin | 29       |
|                        | m/z 408.9829                 | LC1                | prepacifenol epoxide ( <b>20</b> )                                | Chamigrane sesquiterpene    | 30       |
|                        |                              |                    | johnstonol ( <b>21</b> )                                          | Chamigrane sesquiterpene    | 21       |
| <b>F8</b>              | -                            | CC2, DM2           | -                                                                 | -                           | -        |
| <b>F9</b>              | -                            | CC1                | -                                                                 | -                           | -        |
| <b>Individual node</b> | m/z 392.9902                 | LC2                | laureepoxide ( <b>22</b> )                                        | C <sub>15</sub> -acetogenin | 33       |
|                        |                              |                    | (3E)-elatenyne ( <b>23</b> )                                      | C <sub>15</sub> -acetogenin | 29,34    |
|                        |                              |                    | elatenyne ( <b>24</b> )                                           | C <sub>15</sub> -acetogenin | 29,34    |
|                        |                              |                    | kumausallene ( <b>25</b> )                                        | C <sub>15</sub> -acetogenin | 24       |
|                        |                              |                    | laurobtusin ( <b>26</b> )                                         | C <sub>15</sub> -acetogenin | 35       |
| <b>Individual node</b> | m/z 408.9581<br>m/z 410.9542 | LC2                | pacifenol ( <b>27</b> )                                           | Chamigrane sesquiterpene    | 37,38,39 |
